# Supplementary material for: Emerging Personalized Opportunities for Enhancing Translational Readthrough in Rare Genetic Diseases and Beyond
Source: MDPI journal article supplement (doi:10.3390/ijms24076101), 2023-03-23
Supplement: s1 [file s1]

**Supplementary Table S1.** Interventional clinical trials with translation readthrough-inducing drugs (TRIDs).

| NCT Number         | Title                                                                                                                                                    | Status     | Conditions                             | Interventions                  | Phases            | Start Date        | Completion Date  |
|--------------------|----------------------------------------------------------------------------------------------------------------------------------------------------------|------------|----------------------------------------|--------------------------------|-------------------|-------------------|------------------|
| <b>NCT05448755</b> | A Study of ELX-02 in Patients With Alport Syndrome                                                                                                       | Recruiting | Alport Syndrome                        | Drug: ELX-02                   | Phase 2           | November 28, 2022 | May 30, 2023     |
| <b>NCT01141075</b> | Ataluren for Nonsense Mutation Methylmalonic Acidemia                                                                                                    | Terminated | Amino Acid Metabolism, Inborn Errors   | Drug: Ataluren                 | Phase 2           | July 19, 2010     | November 3, 2011 |
| <b>NCT04117880</b> | A Phase 2 Open Label Extension Study in Participants With Nonsense Mutation Aniridia                                                                     | Withdrawn  | Aniridia                               | Drug: Ataluren                 | Phase 2           | December 31, 2018 | January 31, 2021 |
| <b>NCT02647359</b> | Study of Ataluren in Participants With Nonsense Mutation Aniridia                                                                                        | Completed  | Aniridia                               | Drug: Ataluren   Drug: Placebo | Phase 2           | January 31, 2016  | January 22, 2021 |
| <b>NCT04014530</b> | Pembrolizumab With Ataluren in Patients With Metastatic pMMR and dMMR Colorectal Carcinoma or Metastatic dMMR Endometrial Carcinoma: the ATAPEMBRO Study | Recruiting | Colorectal Cancer   Endometrium Cancer | Drug: Ataluren + Pembrolizumab | Phase 1   Phase 2 | August 1, 2019    | August 1, 2023   |
| <b>NCT02107859</b> | Study of Ataluren (PTC124) in Cystic Fibrosis                                                                                                            | Terminated | Cystic Fibrosis                        | Drug: Ataluren                 | Phase 3           | May 23, 2014      | June 5, 2017     |
| <b>NCT02456103</b> | Extension Study of Ataluren in Participants With Nonsense Mutation Cystic Fibrosis                                                                       | Terminated | Cystic Fibrosis                        | Drug: Ataluren                 | Phase 3           | August 31, 2015   | June 2, 2017     |
| <b>NCT01140451</b> | Extension Study of Ataluren (PTC124) in Cystic Fibrosis                                                                                                  | Completed  | Cystic Fibrosis                        | Drug: Ataluren                 | Phase 3           | August 12, 2010   | December 2, 2013 |

|                    |                                                                                                                          |            |                 |                                       |         |                   |                   |
|--------------------|--------------------------------------------------------------------------------------------------------------------------|------------|-----------------|---------------------------------------|---------|-------------------|-------------------|
| <b>NCT03256968</b> | PTC Study to Evaluate Ataluren in Combination With Ivacaftor                                                             | Completed  | Cystic Fibrosis | Drug: Ataluren                        | Phase 4 | January 27, 2017  | December 31, 2018 |
| <b>NCT00458341</b> | A Study of Ataluren in Pediatric Participants With Cystic Fibrosis                                                       | Completed  | Cystic Fibrosis | Drug: Ataluren                        | Phase 2 | March 23, 2007    | February 29, 2008 |
| <b>NCT00237380</b> | Safety and Efficacy of Ataluren (PTC124) for Cystic Fibrosis                                                             | Completed  | Cystic Fibrosis | Drug: Ataluren                        | Phase 2 | November 30, 2005 | May 31, 2006      |
| <b>NCT02139306</b> | Study of Ataluren in Nonsense Mutation Cystic Fibrosis (ACT CF)                                                          | Completed  | Cystic Fibrosis | Drug: Ataluren (PTC124) Drug: Placebo | Phase 3 | August 1, 2014    | November 1, 2016  |
| <b>NCT00803205</b> | Study of Ataluren (PTC124) in Cystic Fibrosis                                                                            | Completed  | Cystic Fibrosis | Drug: Ataluren Drug: Placebo          | Phase 3 | September 8, 2009 | November 12, 2011 |
| <b>NCT04126473</b> | A Phase 2 Study to Evaluate the Safety, Tolerability, PK and PD in Cystic Fibrosis Patients With at Least 1 G542X Allele | Recruiting | Cystic Fibrosis | Drug: ELX-02 Drug: Ivacaftor          | Phase 2 | November 5, 2019  | July 31, 2022     |
| <b>NCT04135495</b> | A Phase 2 Study to Evaluate the Safety, Tolerability, PK and PD of ELX-02 in Cystic Fibrosis Patients With G542X Allele  | Completed  | Cystic Fibrosis | Drug: ELX-02 Drug: Ivacaftor          | Phase 2 | November 25, 2019 | October 3, 2022   |
| <b>NCT00376428</b> | Interest of Gentamicin-induced Readthrough in Cystic Fibrosis Patients                                                   | Terminated | Cystic Fibrosis | Drug: Gentamicin                      | Phase 2 | January 2003      | June 2005         |
| <b>NCT03256799</b> | Evaluation of Ivacaftor in Patients Using Ataluren for Nonsense Mutations                                                | Completed  | Cystic Fibrosis | Drug: Ivacaftor/Ataluren              | Phase 4 | March 17, 2017    | February 16, 2018 |

|                    |                                                                                                                                                    |                         |                             |                  |         |                   |                   |
|--------------------|----------------------------------------------------------------------------------------------------------------------------------------------------|-------------------------|-----------------------------|------------------|---------|-------------------|-------------------|
| <b>NCT00351078</b> | PTC124 for the Treatment of Cystic Fibrosis                                                                                                        | Completed               | Cystic Fibrosis             | Drug: PTC124     | Phase 2 | December 2006     | July 2007         |
| <b>NCT00234663</b> | PTC124 for Cystic Fibrosis                                                                                                                         | Completed               | Cystic Fibrosis             | Drug: PTC124     | Phase 2 | September 1, 2005 | August 1, 2006    |
| <b>NCT00005574</b> | Gentamicin Treatment of Muscular Dystrophy                                                                                                         | Completed               | Duchenne Muscular Dystrophy | Drug: Gentamicin | Phase 1 | February 2000     | January 2001      |
| <b>NCT03648827</b> | A Study to Assess Dystrophin Levels in Participants With Nonsense Mutation Duchenne Muscular Dystrophy (nmDMD)                                     | Completed               | Duchenne Muscular Dystrophy | Drug: Ataluren   | Phase 2 | December 21, 2018 | October 23, 2020  |
| <b>NCT03796637</b> | A Study to Assess Dystrophin Levels in Participants With Nonsense Mutation Duchenne Muscular Dystrophy (nmDMD) Who Have Been Treated With Ataluren | Completed               | Duchenne Muscular Dystrophy | Drug: Ataluren   | Phase 2 | April 11, 2019    | June 3, 2019      |
| <b>NCT02819557</b> | Study of Ataluren in $\geq 2$ to $< 5$ Year-Old Male Participants With Duchenne Muscular Dystrophy                                                 | Completed               | Duchenne Muscular Dystrophy | Drug: Ataluren   | Phase 2 | June 9, 2016      | February 9, 2018  |
| <b>NCT01247207</b> | Study of Ataluren in Previously Treated Participants With Nonsense Mutation Dystrophinopathy (nmDBMD)                                              | Enrolling by invitation | Duchenne Muscular Dystrophy | Drug: Ataluren   | Phase 3 | November 30, 2010 | December 15, 2023 |
| <b>NCT00759876</b> | Phase 2a Extension Study of Ataluren (PTC124) in                                                                                                   | Terminated              | Duchenne Muscular Dystrophy | Drug: Ataluren   | Phase 2 | August 13, 2008   | May 17, 2010      |

|                    |                                                                                                                                         |            |                             |                                                        |         |                   |                   |
|--------------------|-----------------------------------------------------------------------------------------------------------------------------------------|------------|-----------------------------|--------------------------------------------------------|---------|-------------------|-------------------|
|                    | Duchenne Muscular Dystrophy (DMD)                                                                                                       |            |                             |                                                        |         |                   |                   |
| <b>NCT00451074</b> | Six Month Study of Gentamicin in Duchenne Muscular Dystrophy With Stop Codons                                                           | Completed  | Duchenne Muscular Dystrophy | Drug: Gentamicin infusions twice a week for six months | Phase 1 | March 2007        | July 2009         |
| <b>NCT00264888</b> | Safety and Efficacy Study of PTC124 in Duchenne Muscular Dystrophy                                                                      | Completed  | Duchenne Muscular Dystrophy | Drug: PTC124                                           | Phase 2 | December 2005     | May 2007          |
| <b>NCT00847379</b> | Phase 2B Extension Study of Ataluren (PTC124) in Duchenne/Becker Muscular Dystrophy (DMD/BMD)                                           | Terminated | Duchenne Muscular Dystrophy | Drug: Ataluren                                         | Phase 2 | January 31, 2009  | May 24, 2010      |
| <b>NCT01009294</b> | Study of Ataluren (PTC124) in Nonambulatory Participants With Nonsense-Mutation-Mediated Duchenne/Becker Muscular Dystrophy (nmDMD/BMD) | Terminated | Duchenne Muscular Dystrophy | Drug: Ataluren   Drug: Chronic Corticosteroid Therapy  | Phase 2 | January 13, 2010  | March 23, 2010    |
| <b>NCT00592553</b> | Phase 2B Study of PTC124 (Ataluren) in Duchenne/Becker Muscular Dystrophy (DMD/BMD)                                                     | Completed  | Duchenne Muscular Dystrophy | Drug: Ataluren   Drug: Placebo                         | Phase 2 | February 29, 2008 | December 31, 2009 |
| <b>NCT01557400</b> | Study of Ataluren for Previously Treated Participants With Nonsense Mutation Duchenne/Becker Muscular Dystrophy                         | Completed  | Duchenne Muscular Dystrophy | Drug: Ataluren                                         | Phase 3 | May 20, 2012      | January 19, 2018  |

|                    |                                                                                                                                                                                       |                        |                             |                                |                   |                   |                 |
|--------------------|---------------------------------------------------------------------------------------------------------------------------------------------------------------------------------------|------------------------|-----------------------------|--------------------------------|-------------------|-------------------|-----------------|
|                    | (nmDBMD) in Europe, Israel, Australia, and Canada                                                                                                                                     |                        |                             |                                |                   |                   |                 |
| <b>NCT01918384</b> | Phase II Study of NPC-14 (Arbekacin Sulfate) to Explore Safety, Tolerability, and Efficacy in Duchenne Muscular Dystrophy                                                             | Unknown status         | Duchenne Muscular Dystrophy | Drug: NPC-14   Drug: Placebo   | Phase 2           | August 1, 2013    | October 2015    |
| <b>NCT03179631</b> | Long-Term Outcomes of Ataluren in Duchenne Muscular Dystrophy                                                                                                                         | Active, not recruiting | Duchenne Muscular Dystrophy | Drug: Ataluren   Drug: PLACEBO | Phase 3           | July 6, 2017      | July 20, 2023   |
| <b>NCT02090959</b> | An Extension Study of Ataluren (PTC124) in Participants With Nonsense Mutation Dystrophinopathy                                                                                       | Terminated             | Duchenne Muscular Dystrophy | Drug: Ataluren                 | Phase 3           | March 20, 2014    | June 12, 2018   |
| <b>NCT01826487</b> | Phase 3 Study of Ataluren in Participants With Nonsense Mutation Duchenne Muscular Dystrophy (nmDMD)                                                                                  | Completed              | Duchenne Muscular Dystrophy | Drug: Ataluren   Drug: Placebo | Phase 3           | March 26, 2013    | August 20, 2015 |
| <b>NCT04336826</b> | A Study to Evaluate the Safety and Pharmacokinetics of Ataluren in Participants From $\geq 6$ Months to $< 2$ Years of Age With Nonsense Mutation Duchenne Muscular Dystrophy (nmDMD) | Recruiting             | Duchenne Muscular Dystrophy | Drug: Ataluren                 | Phase 2           | December 29, 2021 | March 31, 2023  |
| <b>NCT04644627</b> | Topical Gentamicin Nonsense Suppression Therapy of EB                                                                                                                                 | Completed              | Epidermolysis Bullosa       | Drug: Gentamicin Sulfate       | Phase 1   Phase 2 | December 1, 2020  | May 1, 2022     |

|                    |                                                                                                                                   |                |                                |                                 |         |                    |                   |
|--------------------|-----------------------------------------------------------------------------------------------------------------------------------|----------------|--------------------------------|---------------------------------|---------|--------------------|-------------------|
| <b>NCT02758626</b> | Ataluren for Nonsense Mutation in CDKL5 and Dravet Syndrome                                                                       | Completed      | Epilepsy                       | Drug: ataluren   Drug: Placebo  | Phase 2 | November 1, 2016   | February 27, 2021 |
| <b>NCT04454151</b> | Azithromycin Treatment for Readthrough of APC Gene Stop Codon Mutations in Familial Adenomatous Polyposis                         | Unknown status | Familial Adenomatous Polyposis | Drug: Azithromycin Tablets      | Phase 4 | August 1, 2020     | April 1, 2022     |
| <b>NCT02175914</b> | Erythromycin Treatment for Readthrough of APC Gene Stop Codon Mutations in Familial Adenomatous Polyposis                         | Unknown status | Familial Adenomatous Polyposis | Drug: Erythromycin              | Phase 4 | June 2014          | June 2016         |
| <b>NCT02354560</b> | Erythromycin Treatment for Readthrough of APC Gene Stop Codon Mutation in Familial Adenomatous Polyposis-minors' Adjusted Version | Unknown status | Familial Adenomatous Polyposis | Drug: Erythromycin              | Phase 4 | June 2015          | December 2017     |
| <b>NCT03309605</b> | Phase 1 Study of ELX-02 in Healthy Adult Subjects                                                                                 | Completed      | Healthy                        | Drug: ELX-02   Drug: Placebo    | Phase 1 | October 11, 2017   | July 17, 2019     |
| <b>NCT03292302</b> | Phase 1 Study of ELX-02 in Healthy Adults                                                                                         | Completed      | Healthy                        | Drug: Placebo   Drug: ELX-02    | Phase 1 | September 26, 2017 | December 15, 2017 |
| <b>NCT02807961</b> | Safety, Tolerability, Pharmacokinetics of ELX-02 in Healthy Adult Volunteers                                                      | Terminated     | Healthy                        | Drug: ELX-02   Drug: Placebo    | Phase 1 | July 2016          | May 2017          |
| <b>NCT02409004</b> | Effects of Rifampin on the Pharmacokinetics of Ataluren                                                                           | Completed      | Healthy                        | Drug: Ataluren   Drug: Rifampin | Phase 1 | February 2015      | March 2015        |
| <b>NCT00947193</b> | Study of Ataluren (PTC124) in Hemophilia A and B                                                                                  | Terminated     | Hemophilia A   Hemophilia B    | Drug: Ataluren                  | Phase 2 | October 14, 2009   | August 30, 2011   |

|                    |                                                                                                          |                |                                            |                                      |                 |                   |                   |
|--------------------|----------------------------------------------------------------------------------------------------------|----------------|--------------------------------------------|--------------------------------------|-----------------|-------------------|-------------------|
| <b>NCT03492866</b> | Efficacy of Topical Gentamycin for Hereditary Hypotrichosis Simplex Caused by Nonsense Mutations in CDSN | Unknown status | Hereditary Hypotrichosis Simplex           | Drug: Gentamicin Sulfate             | Phase 2         | April 1, 2018     | April 1, 2019     |
| <b>NCT03776539</b> | A Study to Evaluate the Effects of Renal Impairment on the Pharmacokinetics of ELX-02                    | Completed      | Impaired Renal Function                    | Drug: ELX-02                         | Phase 1         | January 4, 2019   | August 7, 2019    |
| <b>NCT03526159</b> | Gentamicin for Junctional Epidermolysis Bullosa                                                          | Recruiting     | Junctional Epidermolysis Bullosa           | Drug: Gentamicin Sulfate             | Phase 1 Phase 2 | June 1, 2018      | August 31, 2020   |
| <b>NCT04140786</b> | Optimizing IV Gentamicin in JEB                                                                          | Recruiting     | Junctional Epidermolysis Bullosa           | Drug: Gentamicin Sulfate, Injectable | Phase 1 Phase 2 | October 31, 2019  | November 1, 2023  |
| <b>NCT04069260</b> | A Phase 2 Study of ELX-02 in Patients With Nephropathic Cystinosis                                       | Terminated     | Nephropathic Cystinosis                    | Drug: ELX-02                         | Phase 2         | August 2, 2019    | December 17, 2019 |
| <b>NCT03392909</b> | Intravenous Gentamicin Therapy for Recessive Dystrophic Epidermolysis Bullosa (RDEB)                     | Recruiting     | Recessive Dystrophic Epidermolysis Bullosa | Drug: Gentamicin                     | Phase 1 Phase 2 | July 5, 2018      | December 1, 2023  |
| <b>NCT03012191</b> | Gentamicin for RDEB                                                                                      | Completed      | Recessive Dystrophic Epidermolysis Bullosa | Drug: Gentamicin Sulfate             | Phase 1 Phase 2 | February 2, 2017  | August 31, 2018   |
| <b>NCT02698735</b> | Gentamicin Therapy for Recessive Dystrophic Epidermolysis Bullosa (RDEB) Nonsense Mutation Patients      | Completed      | Recessive Dystrophic Epidermolysis Bullosa | Drug: Gentamicin Drug: Placebo       | Phase 1 Phase 2 | February 25, 2016 | June 30, 2017     |
